# Supplementary material
Source: MDPI journal article supplement (https://www.mdpi.com/1999-4907/6/8/2739)
Supplement: s1 [file s1]

**Supplementary Material**

**Supplemental File 1**

Single-Uredinial-Pustule (SUP) Protocol for the Production of Single-Genotype Isolates of *Cronartium quercuum* f.sp. *fusiforme*

1. The SUP protocol starts with *Cronartium quercuum* f.sp *fusiforme* (*Cqf*) aeciospores (Asp) or urediniospores (Usp). These may be freshly collected (already hydrated) spores or they may be vacuum-desiccated spores from storage that have been rehydrated. In either case, inoculum for use on oak seedlings is prepared in deionized water, typically at 0.02 mg/mL of *Cqf* Asp or Usp. With a chromatography sprayer, lightly mist (less than run-off) inoculum onto the underside of young, succulent (about half expanded) northern red oak leaves, and incubate seedlings in the dark for 24–48 h at 21 °C and 100% relative humidity.
2. Subsequent to the humid incubation, remove the plants from the humid chamber and maintain them at 17–21 °C with approximately a 12 h light/12 h dark photoperiod. Uredinial pustules should be evident in 8–14 days.
3. Once pustules are evident and erumpent, remove a leaf with widely dispersed pustules and examine under a dissecting microscope. Look for round, symmetrical pustules that are well separated from others. Avoid clusters of pustules or angular irregularly shaped pustules that may have resulted from fusion of more than one pustule.
4. Use a clean paintbrush moistened with a drop of deionized water to pick-up Usp from a single pustule (this procedure may be aided by use of a dissecting microscope). Place the Usp into
   50–500 uL of deionized water. If necessary, repeat the brush to pustule action until all evident spores are obtained from the single pustule. Place all collections from one pustule into the same aliquot of deionized water.
5. Next, using the paint brush, paint the spore water suspension onto the underside of succulent leaves on one or more new oaks that have not been previously inoculated. Immediately after painting on the spores, place the oaks in a dark 21 °C humid chamber for 24–48 h. Following this humid incubation, remove the plants from the humid chamber and maintain them at 17–21 °C with a 12 h light/12 h dark environment. Uredinial pustules should be evident in 8–14 days.
6. All of the pustules that formed on the plants in step 5 expectedly trace their origin to the originally harvested pustule in step 4. Collect all spores from the step 5 plants using a cyclone spore collector (attached to a microfuge tube) and store the aggregate spore collection at 4 °C. Repeat collection at 3–4 day intervals as long as spores are being produced. Once several mg of spores are acquired, promptly use them to inoculate additional oaks and bulk-up the isolate (step 7 below).
7. For bulking the isolate use 1–5 mg of Usp and 10–50 mL of deionized water. Spray the inoculum with a chromatography sprayer onto the underside of succulent leaves on new oaks that have not been previously inoculated. Inoculate as many oak leaves as possible and spray heavily, almost to the point of run-off. Repeat humid incubation and maintenance as described above in steps 1 and 2 and again collect spores with a cyclone collector. Repeat spore collections as needed, store collected spores at 4 °C, and promptly progress to step 8.
8. Spore desiccation, genotype verification and long term storage:

Microfuge tubes containing the collected Usp are placed in a tube holder in a desktop desiccator maintained at 4 °C and a vacuum is drawn on the chamber for about 60 s. If additional Usp are collected from the step 7 plants and added to the chamber the vacuum is re-drawn each time the chamber is opened. To ensure that all of the moisture is removed before long-term storage,
the spores are kept in the desiccating chamber for 3–4 weeks. During this time a small aliquot of spores is removed for DNA isolation and SSR marker genotyping [28,29] with the chamber vacuum once again being re-established. With regards to genetic marker assessment, to be considered a successful single-genotype isolate, the isolate must have no more than two alleles at each of the tested marker loci. If the SUP isolate being assessed originated from Usp of a previously contaminated isolate, then in order to be considered a successful single-genotype
re-isolation, the re-isolate must have no more than two alleles at each of the tested loci and the alleles must be the same as those that were predominant in the parent from which the re-isolate was derived. Once marker assessment establishes that an isolate is a successful single-genotype isolate or re-isolate, the remaining desiccated Usp are vacuum sealed in glass ampules (~10 mg/ampule) for long term storage at 4 °C.

Note: If more than one SUP line is handled concurrently, the lines must be kept separate to avoid cross-contamination among the different isolates handled. Be sure to soak and/or wash all equipment thoroughly in 70% Etoh and, for equipment that can be oven dried, dry at 70 °C or higher.

© 2015 by the authors; licensee MDPI, Basel, Switzerland. This article is an open access article distributed under the terms and conditions of the Creative Commons Attribution license (http://creativecommons.org/licenses/by/4.0/).
